# Supplementary material for: Synthesis of bis(σ-aryl)dirhodium(iii) caprolactamates by oxidative arylation with arylboronic acids
Source: Royal Society of Chemistry journal article supplement (doi:10.1039/b806283h), 2008-01-01
Supplement: b806283h.pdf [file b806283h.pdf]

**Supplementary information for**

**Synthesis of Bis( $\sigma$ -aryl)dirhodium(III) Caprolactamates by  
Oxidative Arylation With Arylboronic Acids**

Jian-Hua Xie, Jason M. Nichols, Conrad Lubek and Michael P. Doyle\*

Department of Chemistry and Biochemistry, University of Maryland,  
College Park, MD, 20742, USA.

E-mail: mdoyle3@umd.edu

**General:** All reagents and solvents were used without further purification. Yields reported are those obtained after chromatography on silica gel (SiliCycle, 60A, 40-63 mesh), unless otherwise noted. The preparation of dirhodium(II) caprolactamate  $[\text{Rh}_2(\text{cap})_4(\text{CH}_3\text{CN})_2]$  has been previously described.<sup>1</sup>  $^1\text{H}$  NMR and  $^{13}\text{C}$  NMR spectra were obtained on a Bruker DRX-400 NMR as solutions in  $\text{CDCl}_3$  unless otherwise noted. Chemical shifts are reported in parts per million (ppm,  $\delta$ ) downfield from  $\text{Me}_4\text{Si}$  (TMS); coupling constants are reported in Hertz (Hz). UV/Visible spectra were obtained on a Varian Cary 50 spectrophotometer using a xenon flash lamp. IR spectra were recorded on a JASCO FT/IR 4100 spectrometer. Mass spectra were recorded at high resolution with either a VG Micromass 70/70H or VG ZAB-E spectrometer.

**Experimental procedure:**

**General procedure A:**  $\text{Rh}_2(\text{cap})_4(\text{MeCN})_2$  (20.0 mg, 0.027 mmol) and  $[\text{Cu}(\text{OTf})_2]\cdot\text{C}_6\text{H}_6$  (1.5 mg, 3.0  $\mu\text{mol}$ ) were dissolved in  $\text{CH}_2\text{Cl}_2/\text{MeOH}$  (1.5 mL, 4:1) and sonicated for 5 min. This purple solution was then added dropwise to a stirring solution of boronic acid (0.15 – 0.30 mmol) and NaOMe (16.2 mg, 0.30 mmol) in  $\text{CH}_2\text{Cl}_2/\text{MeOH}$  (1.5 mL, 4:1). An additional 2 mL of  $\text{CH}_2\text{Cl}_2/\text{MeOH}$  (4:1) was used to transfer the purple solution and bring the final reaction volume to 5 mL. After

having stirred at room temperature for 10 min, the color of the generated reaction solution changed from purple to green (or orange). With continued stirring for 8–18 h, the reaction was complete (determined by TLC using CH<sub>2</sub>Cl<sub>2</sub> or CH<sub>2</sub>Cl<sub>2</sub>/acetone = 98:2). The solvent was removed under reduced pressure to yield a green (or orange) residue. The residue was purified by chromatography on silica gel. The products were identified spectroscopically.

**General procedure B:** CuSO<sub>4</sub>·5H<sub>2</sub>O (0.75 mg, 3 μmol) was dissolved in 1 mL MeOH, and this solution was added to the mixture of Rh<sub>2</sub>(cap)<sub>4</sub>(MeCN)<sub>2</sub> (22.1 mg, 0.03 mmol), NaOMe (16.2 mg, 0.30 mmol) and arylboronic acid (0.15 – 0.30 mmol) in 4 mL CH<sub>2</sub>Cl<sub>2</sub>. The generated purple reaction solution was stirred at room temperature for 6–20 hrs to complete the reaction (determined by TLC, CH<sub>2</sub>Cl<sub>2</sub> or CH<sub>2</sub>Cl<sub>2</sub>/acetone = 98:2). The solvents were then removed under reduced pressure, and the green solid residue was purified by chromatography on silica gel using CH<sub>2</sub>Cl<sub>2</sub> or CH<sub>2</sub>Cl<sub>2</sub>/acetone as the eluent. The products were identified spectroscopically.

***Bis-σ*-(phenyl) tetrakis-μ**-(caprolactamato)dirhodium(III) (**1**):<sup>2</sup>

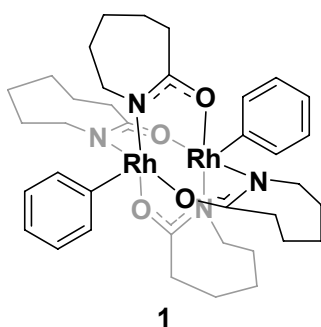

Green solid. <sup>1</sup>H NMR (400 MHz, CDCl<sub>3</sub>): δ 7.54 (comp, 4H), 7.12 (comp, 6H), 3.10–3.00 (comp, 8H), 2.53–2.38 (comp, 8H), 1.83 (comp, 4H), 1.70–1.45 (comp, 20H). <sup>13</sup>C NMR (100 MHz, CDCl<sub>3</sub>): δ 183.7, 148.0 (d, *J* = 37.0 Hz), 137.1, 126.1, 124.0, 51.4, 38.6, 30.7, 29.8, 24.3.

***Bis-σ*-(3-nitrophenyl)-tetrakis-μ**-(caprolactamato)dirhodium(III) (**2a**):

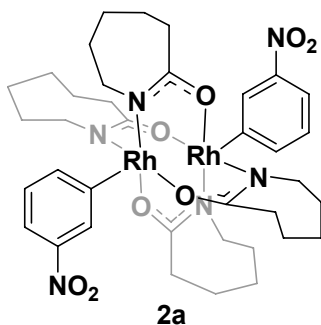

Green solid. <sup>1</sup>H NMR (400 MHz, CDCl<sub>3</sub>): δ 8.38 (s, 2H), 8.04 (dd, *J* = 8.0, 1.6 Hz, 2H), 7.92 (d, *J* = 8.0 Hz, 2H), 7.28 (t, *J* = 8.0 Hz, 2H), 3.05–2.94 (comp, 8H), 2.54–2.41 (comp,

8H), 1.88 (comp, 4H), 1.79–1.53 (comp, 12H), 1.56–1.43 (comp, 8H).  $^{13}\text{C}$  NMR (100 MHz,  $\text{CDCl}_3/\text{MeOD}$ , 4:1):  $\delta$  184.6, 145.6, 143.4, 141.4 (d,  $J = 14.2$  Hz), 131.2, 126.1, 119.9, 51.9, 39.0, 30.7, 29.6, 24.4. UV/Visible ( $\text{CH}_2\text{Cl}_2$ ): 423 nm ( $\epsilon = 6440 \text{ M}^{-1}\text{cm}^{-1}$ ). IR (neat): 1340, 1512, 1584  $\text{cm}^{-1}$ . HRMS (ESI): Calcd for  $\text{C}_{36}\text{H}_{49}\text{N}_6\text{O}_8\text{Rh}_2$  ( $[\text{M}+\text{H}]^+$ ): 899.1722; found: 899.1691.

***Bis- $\sigma$ -(3-formylphenyl)-tetrakis- $\mu$ -(caprolactamato)dirhodium (III) (2b):***

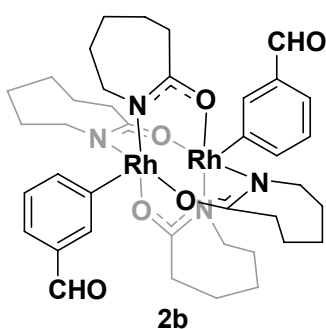

Green solid.  $^1\text{H}$  NMR (400 MHz,  $\text{CDCl}_3$ ):  $\delta$  10.00 (s, 2H), 8.08 (s, 2H), 7.87 (d,  $J = 7.6$  Hz, 2H), 7.67 (d,  $J = 7.6$  Hz, 2H), 7.31 (t,  $J = 7.6$  Hz, 2H), 3.02–2.93 (comp, 8H), 2.53–2.42 (comp, 8H), 1.88 (comp, 4H), 1.67–1.46 (comp, 20H).  $^{13}\text{C}$  NMR (100 MHz,  $\text{CDCl}_3$ ):  $\delta$  192.8, 184.5, 148.3 (d,  $J = 37.0$  Hz), 143.9, 139.2, 127.1, 126.0, 52.1, 39.2, 31.1, 30.2, 24.8. UV/Visible ( $\text{CH}_2\text{Cl}_2$ ): 425 nm ( $\epsilon = 4090 \text{ M}^{-1}\text{cm}^{-1}$ ). IR (neat): 1589  $\text{cm}^{-1}$ . HRMS (ESI): Calcd for  $\text{C}_{38}\text{H}_{50}\text{N}_4\text{O}_6\text{Rh}_2\text{Na}$  ( $[\text{M}+\text{Na}]^+$ ): 887.1738; found: 887.1263.

***Bis- $\sigma$ -(4-formylphenyl)-tetrakis- $\mu$ -(caprolactamato)dirhodium(III) (2c):***

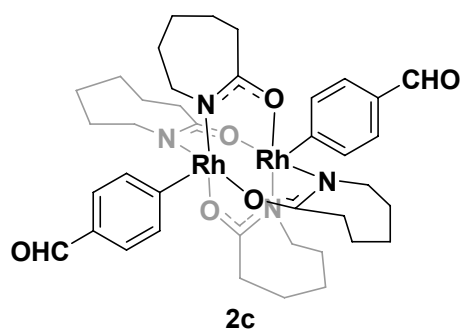

Green solid.  $^1\text{H}$  NMR (400 MHz,  $\text{CDCl}_3$ ):  $\delta$  10.03 (s, 2H), 7.80 (d,  $J = 8.4$  Hz, 4H), 7.61 (d,  $J = 8.4$  Hz, 4H), 2.90 (comp, 8H), 2.53–2.38 (comp, 8H), 1.85 (comp, 4H), 1.68–1.43 (comp, 20H).  $^{13}\text{C}$  NMR (100 MHz,  $\text{CDCl}_3$ ):  $\delta$  192.1, 184.1, 161.4 (d,  $J = 37.0$  Hz), 137.6, 133.6, 126.4, 51.5, 38.6, 30.5, 29.6, 24.2. UV/Visible ( $\text{CH}_2\text{Cl}_2$ ): 422 nm ( $\epsilon = 7890 \text{ M}^{-1}\text{cm}^{-1}$ ). IR (neat): 1564, 1690  $\text{cm}^{-1}$ . HRMS (ESI): Calcd for  $\text{C}_{38}\text{H}_{51}\text{N}_4\text{O}_6\text{Rh}_2$  ( $[\text{M}+\text{H}]^+$ ): 865.1919; found: 865.1931.

***Bis- $\sigma$ -(4-bromophenyl)-tetrakis- $\mu$ -(caprolactamato)dirhodium(III) (2d):***

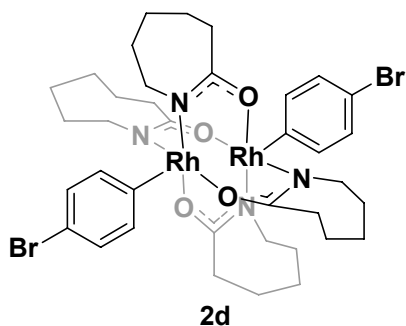

Green solid. This compound was insoluble in all NMR solvents to the extent that NMR spectra were not obtained. UV/Visible (CH<sub>2</sub>Cl<sub>2</sub>): 432 nm ( $\epsilon = 7970 \text{ M}^{-1}\text{cm}^{-1}$ ). IR (neat): 1340, 1512, 1584 cm<sup>-1</sup>. HRMS (ESI): Calcd for C<sub>36</sub>H<sub>48</sub>Br<sub>2</sub>N<sub>4</sub>O<sub>4</sub>Rh<sub>2</sub>Na ([M+Na]<sup>+</sup>): 989.0030; found: 988.9886.

***Bis-σ-(4-methoxyphenyl)-tetrakis-μ-(caprolactamato)dirhodium(III) (2e):***

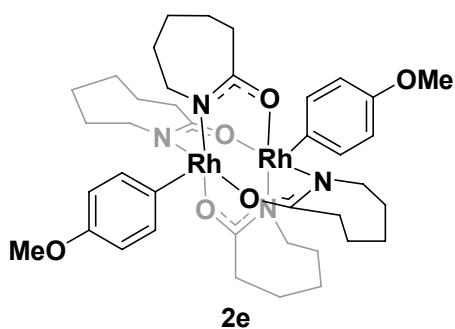

Green solid. <sup>1</sup>H NMR (400 MHz, CDCl<sub>3</sub>):  $\delta$  7.41 (d,  $J = 8.8 \text{ Hz}$ , 4H), 6.82 (d,  $J = 8.8 \text{ Hz}$ , 4H), 3.86 (s, 6H), 3.08–2.95 (comp, 8H), 2.50–2.37 (comp, 8H), 1.84 (comp, 4H), 1.62–1.55 (comp, 12H), 1.55–1.42 (comp, 8H). <sup>13</sup>C NMR (100 Hz, CDCl<sub>3</sub>):  $\delta$  183.4, 157.7, 136.8, 134.2 (d,  $J = 38.7 \text{ Hz}$ ), 112.0, 55.2, 51.3, 38.5, 30.6, 29.7, 24.3. UV/Visible (CH<sub>2</sub>Cl<sub>2</sub>): 452 nm ( $\epsilon = 6220 \text{ M}^{-1}\text{cm}^{-1}$ ). IR (neat): 1231, 1588 cm<sup>-1</sup>. HRMS (ESI): Calcd for C<sub>38</sub>H<sub>55</sub>N<sub>4</sub>O<sub>6</sub>Rh<sub>2</sub> ([M+H]<sup>+</sup>): 869.2232; found: 869.2226.

***Bis-σ-{4-(tert-butylcarbamato)phenyl}-tetrakis-μ-(caprolactamato)-dirhodium(III) (2f):***

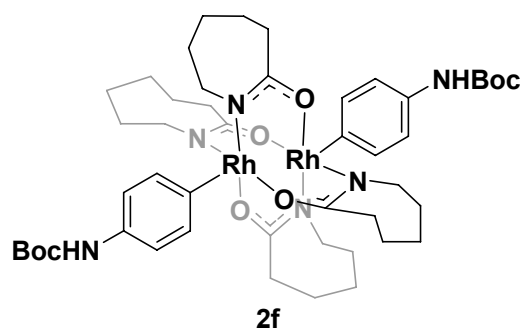

Yellow solid. <sup>1</sup>H NMR (400 MHz, CDCl<sub>3</sub>):  $\delta$  7.42 (d,  $J = 8.4 \text{ Hz}$ , 4H), 7.17 (d,  $J = 8.4 \text{ Hz}$ , 4H), 6.44 (s, 2H), 3.06–2.92 (comp, 8H), 2.47–2.35 (comp, 8H), 1.80 (comp, 4H), 1.65–1.37 (comp, 38H). <sup>13</sup>C NMR (100 MHz, CDCl<sub>3</sub>):  $\delta$  183.4, 152.7, 138.2 (d,  $J = 39.0 \text{ Hz}$ ), 136.2, 134.7, 117.1, 79.6, 51.1, 38.4, 30.3, 29.3, 28.0, 24.0.

UV/Visible (CH<sub>2</sub>Cl<sub>2</sub>): 450 nm ( $\epsilon = 12600 \text{ M}^{-1}\text{cm}^{-1}$ ). IR (neat): 2923, 1727, 1586, 1496 cm<sup>-1</sup>. HRMS (ESI): Calcd for C<sub>46</sub>H<sub>69</sub>N<sub>6</sub>O<sub>8</sub>Rh<sub>2</sub> ([M+H]<sup>+</sup>): 1039.3209; found: 1039.3290.

***Bis- $\sigma$* -{4-(*N,N*-dimethylanimo)phenyl}-*tetrakis- $\mu$* -(caprolactamato)dirhodium(III) (2g):**

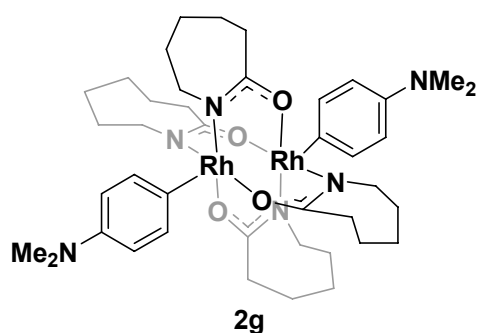

Purple solid. <sup>1</sup>H NMR (400 MHz, CDCl<sub>3</sub>):  $\delta$  7.35 (d,  $J = 8.8$  Hz, 4H), 6.72 (d,  $J = 8.8$  Hz, 4H), 3.12–2.96 (comp, 8H), 2.98 (s, 12 H), 2.46–2.36 (comp, 8H), 1.82 (comp, 4H), 1.61–1.37 (comp, 20H). <sup>13</sup>C NMR (100 MHz, CDCl<sub>3</sub>):  $\delta$  183.6, 148.8, 136.4, 131.4 (d,  $J = 37.6$  Hz), 112.9, 51.5,

41.6, 38.9, 30.8, 29.9, 24.5. UV/Visible (CH<sub>2</sub>Cl<sub>2</sub>): 485 nm ( $\epsilon = 3050 \text{ M}^{-1}\text{cm}^{-1}$ ). IR (neat): 1589 cm<sup>-1</sup>. HRMS (ESI): Calcd for C<sub>40</sub>H<sub>61</sub>N<sub>6</sub>O<sub>4</sub>Rh<sub>2</sub> ([M+H]<sup>+</sup>): 895.2864; found: 895.2848.

***Bis- $\sigma$* -(3-thienyl)-*tetrakis- $\mu$* -(caprolactamato)dirhodium(III) (2h).**

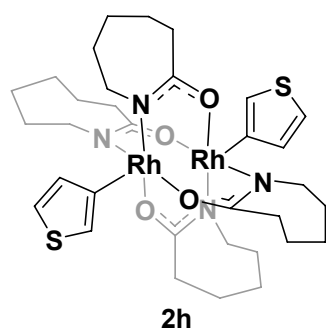

Yellow solid. <sup>1</sup>H NMR (400 MHz, CDCl<sub>3</sub>):  $\delta$  7.40 (d,  $J = 4.8$  Hz, 2H), 7.33 (dd,  $J = 4.8, 3.2$  Hz, 2H), 7.11 (d,  $J = 3.2$  Hz, 2H), 3.08–2.97 (comp, 8H), 2.53–2.37 (comp, 8H), 1.86 (comp, 4H), 1.63–1.55 (comp, 12H), 1.54–1.39 (comp, 8H). <sup>13</sup>C NMR (100 MHz, CDCl<sub>3</sub>/MeOD, 4:1):  $\delta$  184.2, 133.3, 127.8 (d,  $J = 39.2$  Hz), 120.5, 119.8, 52.1,

39.3, 31.2, 30.2, 24.9. UV/Visible (CH<sub>2</sub>Cl<sub>2</sub>): 457 nm ( $\epsilon = 5890 \text{ M}^{-1}\text{cm}^{-1}$ ). IR (neat): 442, 1585 cm<sup>-1</sup>. HRMS (ESI): Calcd for C<sub>32</sub>H<sub>47</sub>N<sub>4</sub>O<sub>4</sub>S<sub>2</sub>Rh<sub>2</sub> ([M+H]<sup>+</sup>): 821.1149; found: 821.1181.

***Bis- $\sigma$* -(4-nitrophenyl)-*tetrakis- $\mu$* -(caprolactamato)dirhodium(III) (2i):**

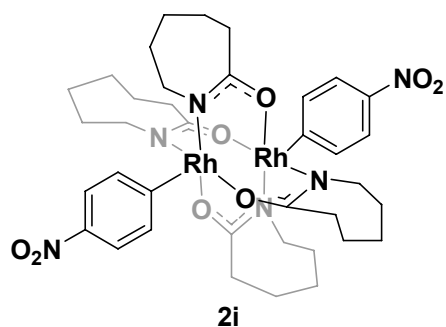

Green solid.  $^1\text{H}$  NMR (400 MHz,  $\text{CDCl}_3$ ):  $\delta$  7.97 (d,  $J = 8.8$  Hz, 4H), 7.76 (d,  $J = 8.8$  Hz, 4H), 2.93 (comp, 8H), 2.51–2.37 (comp, 8H), 1.83 (comp, 4H), 1.65–1.38 (comp, 20H). This compound was insoluble in all NMR solvents to the extent that its  $^{13}\text{C}$  NMR spectrum was not obtained. UV/Visible ( $\text{CH}_2\text{Cl}_2$ ): 415 nm ( $\epsilon = 8850 \text{ M}^{-1}\text{cm}^{-1}$ ). HRMS (ESI): Calcd for  $\text{C}_{36}\text{H}_{48}\text{N}_6\text{O}_8\text{Rh}_2$  ( $\text{M}^+$ ): 898.1644; found: 898.1675.

***Bis-σ-(4-methoxycarbonylphenyl)-tetrakis-μ-(caprolactamato)dirhodium(III)***

**(2j):**

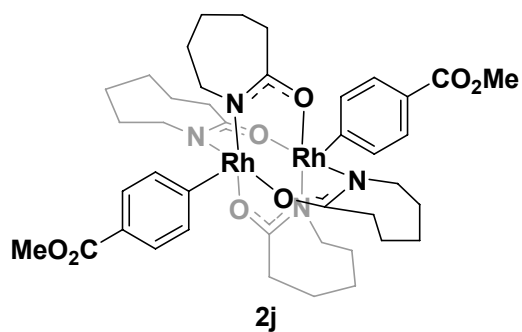

Green solid.  $^1\text{H}$  NMR (400 MHz,  $\text{CDCl}_3$ ):  $\delta$  7.76 (d,  $J = 8.4$  Hz, 4H), 7.65 (d,  $J = 8.4$  Hz, 4H), 3.91 (s, 6H), 2.92 (comp, 8H), 2.42 (comp, 8H), 1.80 (comp, 4H), 1.58–1.39 (comp, 20H).  $^{13}\text{C}$  NMR (100 MHz,  $\text{CDCl}_3$ ):  $\delta$  184.3, 168.1, 157.6 (d,  $J = 36.6$  Hz), 136.9, 126.9, 126.4, 51.8, 51.6, 38.9, 30.7, 29.8, 24.4. UV/Visible ( $\text{CH}_2\text{Cl}_2$ ): 425 nm ( $\epsilon = 8170 \text{ M}^{-1}\text{cm}^{-1}$ ). HRMS (ESI): Calcd for  $\text{C}_{40}\text{H}_{54}\text{N}_4\text{O}_8\text{Rh}_2$  ( $\text{M}^+$ ): 924.2050; found: 924.2090.

***Bis-σ-(4-trifluoromethylphenyl)-tetrakis-μ-(caprolactamato)dirhodium(III)*** (2k):

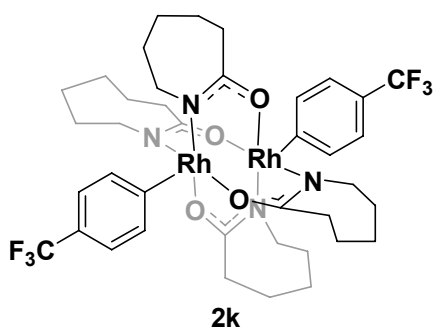

Green solid.  $^1\text{H}$  NMR (400 MHz,  $\text{CDCl}_3$ ):  $\delta$  7.65 (d,  $J = 8.4$  Hz, 4H), 7.35 (d,  $J = 8.4$  Hz, 4H), 2.95 (comp, 8H), 2.51–2.35 (comp, 8H), 1.81 (comp, 4H), 1.62–1.38 (comp, 20H).  $^{13}\text{C}$

NMR (100 MHz,  $\text{CDCl}_3/\text{CD}_2\text{Cl}_2$ , 1:1):  $\delta$  184.0, 167.9 (d,  $J = 23.3$  Hz), 154.5, 142.9, 137.4, 121.8 (q,  $J = 3.2$  Hz), 51.4, 38.2, 30.6, 29.9, 29.8. UV/Visible ( $\text{CH}_2\text{Cl}_2$ ): 420 nm ( $\epsilon = 4160 \text{ M}^{-1}\text{cm}^{-1}$ ). HRMS (ESI): Calcd for  $\text{C}_{38}\text{H}_{49}\text{F}_6\text{N}_4\text{O}_4\text{Rh}_2$  ( $[\text{M}+\text{H}]^+$ ): 945.1768; found: 945.1784.

***Bis- $\sigma$ -(4-methylphenyl)-tetrakis- $\mu$ -(caprolactamato)dirhodium(III) (2l):***

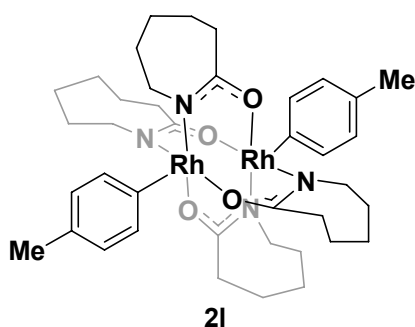

Green solid.  $^1\text{H}$  NMR (400 MHz,  $\text{CDCl}_3$ ):  $\delta$  7.37 (d,  $J = 8.4$  Hz, 4H), 6.94 (d,  $J = 8.4$  Hz, 4H), 3.08–2.90 (comp, 8H), 2.47–2.38 (comp, 14H), 1.80 (comp, 4H), 1.65–1.36 (comp, 20H).  $^{13}\text{C}$  NMR (100 MHz,  $\text{CDCl}_3$ ):  $\delta$  183.8, 142.8 (d,  $J = 37.0$  Hz), 136.6, 133.4, 127.3, 51.5, 38.8, 30.8, 29.8, 24.4, 20.6. UV/Visible ( $\text{CH}_2\text{Cl}_2$ ): 440 nm ( $\epsilon = 8060 \text{ M}^{-1}\text{cm}^{-1}$ ). HRMS (ESI): Calcd for  $\text{C}_{38}\text{H}_{55}\text{N}_4\text{O}_4\text{Rh}_2$  ( $[\text{M}+\text{H}]^+$ ): 837.2333; found: 837.2370.

***Bis- $\sigma$ -(4-phenylphenyl)-tetrakis- $\mu$ -(caprolactamato)dirhodium(III) (2m):***

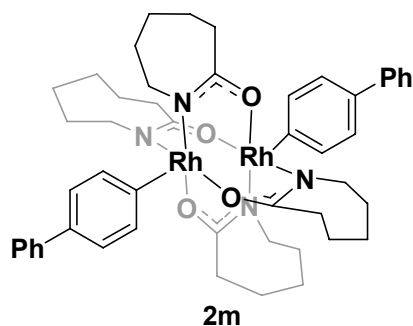

Green solid.  $^1\text{H}$  NMR (400 MHz,  $\text{CDCl}_3$ ):  $\delta$  7.66 (d,  $J = 7.2$  Hz, 4H), 7.61 (d,  $J = 8.4$  Hz, 4H), 7.43 (t,  $J = 7.2$  Hz, 4H), 7.36 (d,  $J = 8.4$  Hz, 4H), 7.29 (t,  $J = 7.2$  Hz, 2H), 3.05 (comp, 8H), 2.45 (comp, 8H), 1.83 (comp, 4H), 1.68–1.42 (comp, 20H).  $^{13}\text{C}$  NMR (100 MHz,  $\text{CDCl}_3$ ):  $\delta$  184.0, 156.2, 146.6 (d,  $J = 37.0$  Hz), 143.7, 137.3, 127.8, 126.5, 125.1, 113.9, 51.7, 38.9, 30.8, 29.7, 24.5. UV/Visible ( $\text{CH}_2\text{Cl}_2$ ): 440 nm ( $\epsilon = 130 \text{ M}^{-1}\text{cm}^{-1}$ ). HRMS (ESI): Calcd for  $\text{C}_{48}\text{H}_{59}\text{N}_4\text{O}_4\text{Rh}_2$  ( $[\text{M}+\text{H}]^+$ ): 961.2646; found: 961.2693.

***Bis- $\sigma$ -(6-methoxynaphthalen-2-yl)-tetrakis- $\mu$ -(caprolactamato)dirhodium(III) (2n):***

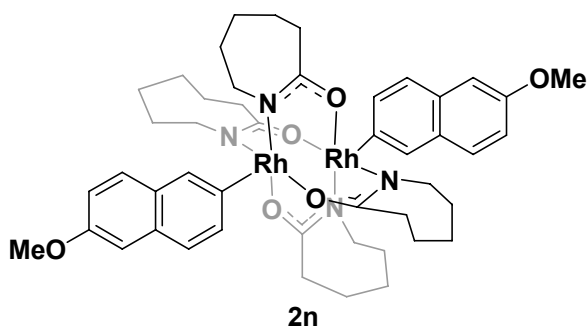

Green solid.  $^1\text{H}$  NMR (400 MHz,  $\text{CDCl}_3$ ):  $\delta$  7.84 (d,  $J = 1.2$  Hz, 2H), 7.74–7.70 (comp, 4H), 7.51 (d,  $J = 1.2$  Hz, 2H), 7.18 (d,  $J = 2.4$  Hz, 2H), 7.07 (dd,  $J = 8.8, 2.4$  Hz, 2H), 3.93 (s, 6H), 3.10–2.90 (comp, 8H), 2.45 (comp, 8H),

1.83 (comp, 4H), 1.72–1.41 (comp, 20H).  $^{13}\text{C}$  NMR (100 MHz,  $\text{CDCl}_3$ ):  $\delta$  184.0, 156.5, 135.8, 134.5, 132.8 (d,  $J = 36.9$  Hz), 128.5, 127.8, 123.8, 117.3, 113.9, 105.5, 55.3, 51.6, 38.9, 30.8, 29.7, 24.5. UV/Visible ( $\text{CH}_2\text{Cl}_2$ ): 455 nm ( $\epsilon = 6120 \text{ M}^{-1}\text{cm}^{-1}$ ). HRMS (ESI): Calcd for  $\text{C}_{46}\text{H}_{59}\text{N}_4\text{O}_6\text{Rh}_2$  ( $[\text{M}+\text{H}]^+$ ): 969.2545; found: 969.2552.

#### References:

1. M. P. Doyle, L. J. Westrum, W. N. E. Wolthuis, M. M. See, W. P. Boone, V. Bagheri, and M. M. Pearson, *J. Am. Chem. Soc.* 1993, **115**, 958.
2. J. M. Nichols, J. Wolf, P. Zavalij, B. Varughese and M. P. Doyle, *J. Am. Chem. Soc.*, 2007, **129**, 3504.
